# Supplementary figures and images for: Understanding the causes, socio-economic and environmental impacts, and management of veld fires in tropical Zimbabwe
Source: Springer Nature journal article supplement (doi:10.1186/2193-0414-2-2), 2013-01-01

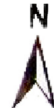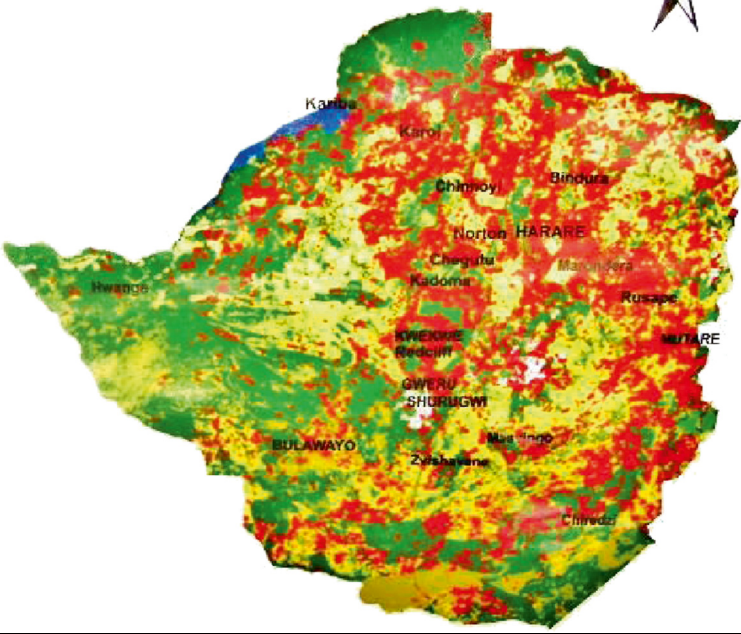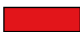

Fires

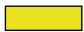

Cultivation

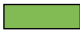

Natural Forests

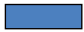

Water

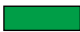

Forest Plantation

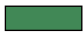

Wooded grassland

Supplement: 40038_2013_5_MOESM1_ESM.pdf [file 40038_2013_5_MOESM1_ESM.pdf]
